# Supplementary material for: Discordant Phylogenomic Placement of Hydnoraceae and Lactoridaceae Within Piperales Using Data From All Three Genomes
Source: Front Plant Sci. 2021 Apr 12;12:642598. doi: 10.3389/fpls.2021.642598 (PMC8072514; doi:10.3389/fpls.2021.642598)
Supplement: Supplementary file 2 [file Table_1.xlsx]

## Sheet: Tabelle1
Table S1 Overview of data used in this study separated by genome. Accessions contain GenBank or SRA identifiers and references in case of publicly available data and a "this study" tag if it corresponds to new data first introduced in this study. In Canellales, "xxx" signifies that data for a certain genome is not available yet for a certain family.
Order	Family	Taxon	plastid loci		mitochondrial loci		nuclear loci
			Accession number	Source	Accession number	Source	Accession number	Source
Amborellales	Amborellaceae	Amborella trichopoda	NC_005086	Goremykin et al. 2003	KF754803	Rice et al. 2013	n.a.	Jiao et al. 2011, Duarte et al. 2010
Nymphaeales	Nymphaceae	Nymphaea	NC_006050	Goremykin et al. 2004	NC_037468	Dong et al. 2018	PRJNA508901	Povilus et al. 2020
Austrobaileyales	Schisandraceae	Schisandra	NC_037145	Yu et al., unpublished	NC_042758	Yu et al., unpublished	ERX4143577	KEW RBG 2020
Chloranthales	Chloranthaceae	Chloranthus	NC_009598	Hansen et al. 2007	AF197665, AF197753, AY009439, DQ008692, DQ008819, DQ406864, DQ916608, GU351613, KF632736, KF632869	Petersen et al. 2016, Qiu et al. 2010, Davis et al. 2006, Qiu et al. 2006, Qiu et al. 2005, Barkman et al. 2000, Qiu et al. 1999	ERX4143594, KC862124, KC862133, KC862144, KC862159, KC862190, KC862204, KC862216, KC862231	KEW RBG 2020, Naumann et al. 2013, Duarte et al. 2010
Magnoliales	Magnoliaceae	Liriodendron tulipifera	NC_008326	Cai et al. 2006	NC_021152	Richardson et al. 2013	n.a.	Jiao et al. 2011, Duarte et al. 2010
Laurales	Calycanthaceae	Calycanthus	NC_037504	Chen et al. 2018	SRX8491486, SRX8491497, SRX8491504 - SRX8491513	Shang et al. 2020	SRX8491486, SRX8491497, SRX8491504 - SRX8491513, KC862142, KC862157, KC862178, KC862189, KC862202, KC862214, KC862230	Shang et al. 2020, Naumann et al. 2013
Canellales	Winteraceae	Drimys	NC_008456	Cai et al. 2006	AF193922, AF197162, AF197673, AF197781, AY009443, DQ008801, DQ406919, DQ916616, GU351649, KF632729, KF632858	Petersen et al. 2016, Qiu et al. 2010, Davis et al. 2006, Qiu et al. 2006, Qiu et al. 2005, Barkman et al. 2000, Qiu et al. 1999, Parkinson et al. 1999	xxx	xxx
	Canellaceae	Canella	xxx	xxx	xxx	xxx	KC862132, KC862143, KC862158, KC862203, KC862215	Naumann et al. 2013
Piperales	Aristolochiaceae	Aristolochia	unpublished	Jiano, Yuannian	unpublished	Jiano, Yuannian	unpublished	Jiano, Yuannian
		Thottea	this study	this study	this study	this study	this study, KC862138, KC862149, KC862168, KC862184, KC862196, KC862208, KC862224, KC862237	this study, Naumann et al. 2013
		Asarum	NC_037190	Lim et al. 2018	AF193913, AF197671, AF197751, AY009432, AY831978, AY831983, AY832018, AY832063, AY832096, AY832105, AY832191, AY832206, AY832212, AY832240, AY832251, AY832272, AY832309, DQ008676, DQ008799, DQ406915, DQ916630	Davis et al. 2006, Qiu et al. 2006, Qiu et al. 2005, Bergthorsson et al. 2004, Barkman et al. 2000, Qiu et al. 1999, Parkinson et al. 1999	KC862155, KC862171, KC862187, KC862200, KC862212, KC862228	Naumann et al. 2013
	Asaraceae	Saruma henryi	NC_039933	Sinn et al. 2018	AF197672, AF197752, DQ008677, DQ008800, DQ406912, DQ916631, GU351803	Qiu et al. 2010, Davis et al. 2006, Qiu et al. 2006, Qiu et al. 2005, Qiu et al. 1999, Lee et al. 1999	KC862136, KC862166, KC862175, KC862182, KC862222	Naumann et al. 2013, Duarte et al. 2010
	Hydnoraceae	Hydnora	NC_029358	Naumann et al. 2016	this study	this study	KC862126, KC862130, KC862134, KC862146, KC862154, KC862161, KC862174, KC862177, KC862179, KC862192, KC862206, KC862211, KC862218	Naumann et al. 2013
		Prosopanche americana	MT075717	Jost et al. 2020	this study	this study	this study	this study
	Lactoridaceae	Lactoris fernandeziana	this study	this study	this study	this study	this study, ERX4143470, KC862162	this study, KEW RBG 2020, Naumann et al. 2013
	Piperaceae	Manekia	this study	this study	this study	this study	this study, KC862163, KC862193, KC862207, KC862219, KC862233	this study, Naumann et al. 2013
		Piper	NC_034692	Zhang et al., unpublished	PRJNA529758	Hu et al. 2019	PRJNA529758	Hu et al. 2019
		Peperomia	this study	this study	this study	this study	this study, SRX5324494	this study, Lim et al. 2019
		Verhuellia	this study	this study	this study	this study	this study, KC862139, KC862150, KC862169, KC862185, KC862197, KC862209, KC862225	this study, Naumann et al. 2013
		Zippelia begoniifolia	this study	this study	this study	this study	this study	this study
	Saururaceae	Anemopsis californica	this study	this study	this study	this study	this study	this study
		Gymnotheca chinensis	this study	this study	this study	this study	this study	this study
		Houttuynia cordata	this study	this study	this study	this study	this study	this study
		Saururus	this study	this study	this study	this study	this study, ERX4143438	this study, KEW RBG 2020
